# Supplementary material for: RadD from Fusobacterium nucleatum Engages NKp46 to Promote Antitumor Cytotoxicity
Source: eLife journal article supplement (doi:10.7554/elife.108439), 2025-09-29
Supplement: fig2-data2 [file Figure 2 Source data 1 labeled.pdf › Figure 2 Source data 1 - labeled/Figure 2 Source data 1 labeled.pdf]

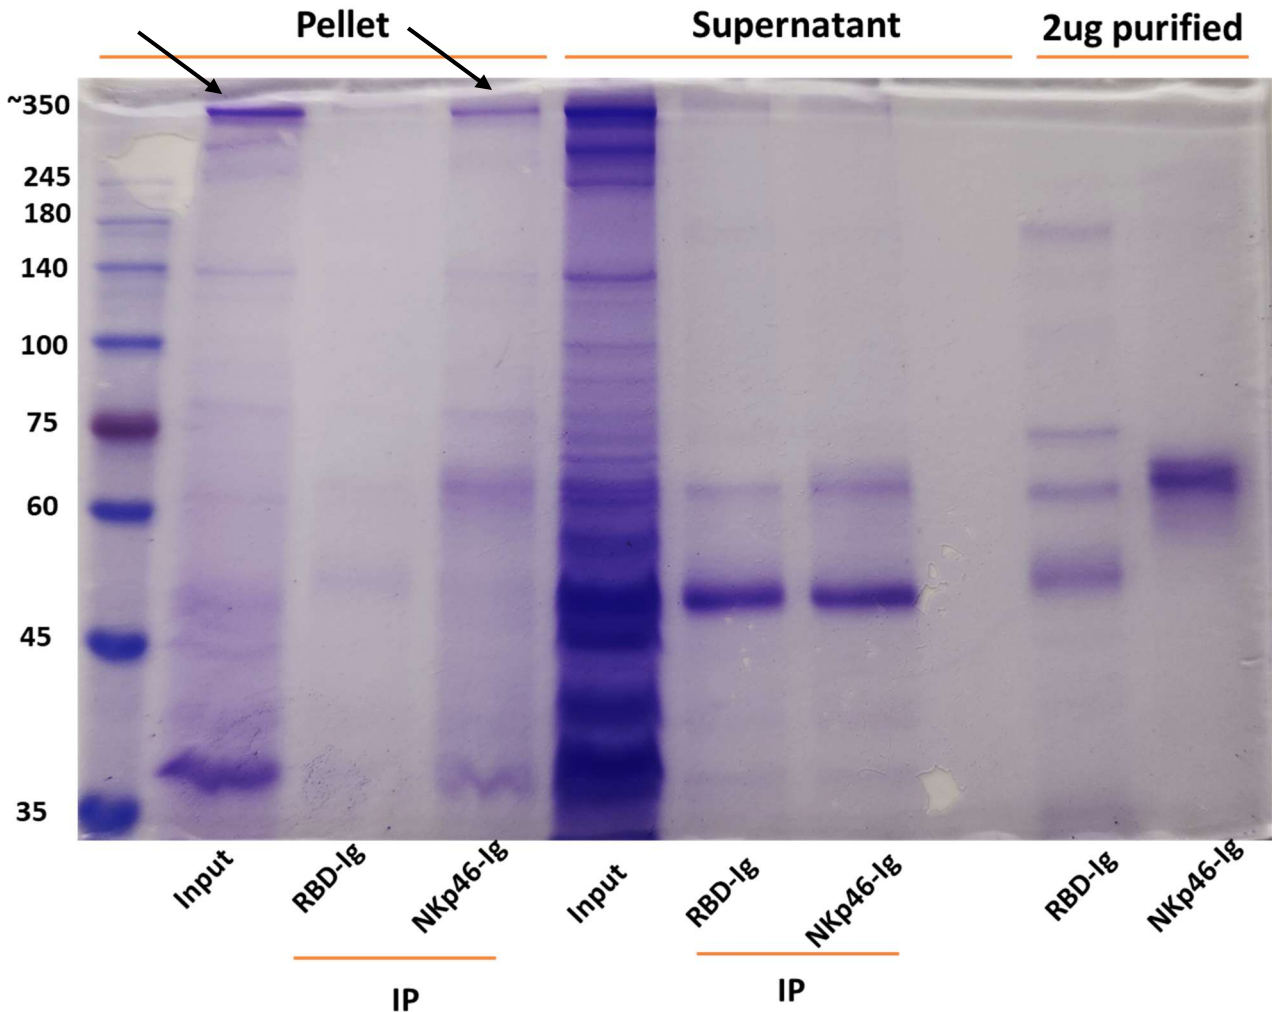

**Figure 2, Source Data 1.** Original Western blot validating the interaction between *Fusobacterium nucleatum* and NKp46. An immunoprecipitation assay was performed using an NKp46-Ig fusion protein with *F. nucleatum* subsp. *nucleatum* ATCC 23726. Molecular weight markers are shown on the left. Lane 1 (Input) contains total lysates from the bacterial pellet (membrane protein fraction), showing a band corresponding to RadD (~350 kDa)-arrow. Lane 2 (RBD-Ig control) shows immunoprecipitation with 2.5  $\mu$ g of control RBD-Ig, with no detectable band at ~350 kDa. Lane 3 (NKp46-Ig) shows immunoprecipitation with 2.5  $\mu$ g of NKp46-Ig, revealing a band at ~350 kDa-arrow. Lanes 4–6 correspond to the supernatant fraction of the bacterial lysate. No bands are observed in lanes 5 and 6, indicating a lack of interaction in this fraction. Lanes 7 and 8 contain 2.5  $\mu$ g of purified RBD-Ig and NKp46-Ig proteins, respectively.
