# Supplementary material for: RadD from Fusobacterium nucleatum engages NKp46 to promote antitumor cytotoxicity
Source: eLife. 2026 May 1;14:RP108439. doi: 10.7554/eLife.108439 (PMC13134850; doi:10.7554/eLife.108439)
Supplement: Figure 1—figure supplement 1—source data 1. [file elife-108439-fig1-figsupp1-data1.xlsx]

## Sheet: Sheet1
Figure 1A-figure 1 supplemnt-source data 1															Figure 1B-figure 1 supplemnt-source data 1
	Fn positive HNSCC	Fn negative HNSCC	Fn positive CRC	Fn negative CRC												Fn positive HNSCC	Fn negative HNSCC	Fn positive CRC	Fn negative CRC
	4.7032	6.12899	6.45028	5.14767												7.66217	8.98124	12.4434	10.5957
	3.23198	4.59747	5.75145	5.18113												7.32658	8.78945	10.1948	12.1999
	5.00179	3.74074	2.43756	5.22924												9.47325	5.21679	12.4522	11.0947
	3.65946	5.07172	4.69526	2.28443												4.94365	7.76305	12.326	12.2975
	5.00992	3.46083	5.22182	3.66047												9.85011	6.99238	10.4932	11.3174
	4.34331	4.32123	4.83912	4.0407		Bonferroni's multiple comparisons test	Mean Diff.	95.00% CI of diff.	Significant?	Summary	Adjusted P Value					9.95736	8.56234	12.6735	11.9819		Bonferroni's multiple comparisons test	Mean Diff.	95.00% CI of diff.	Significant?	Summary	Adjusted P Value
	4.17986	6.32215	5.61079	5.61666		Fn positive HNSCC vs. Fn negative HNSCC	-0.3023	-0.9719 to 0.3672	No	ns	>0.9999					8.20152	8.12425	13.0595	9.92854		Fn positive HNSCC vs. Fn negative HNSCC	0.3103	-0.3246 to 0.9451	No	ns	>0.9999
	5.15988	6.12476	5.25024	4.9489		Fn positive HNSCC vs. Fn positive CRC	0.1609	-0.3881 to 0.7098	No	ns	>0.9999					10.0536	6.98902	13.2279	11.7792		Fn positive HNSCC vs. Fn positive CRC	-3.455	-3.976 to -2.935	Yes	****	<0.0001
	7.17687	4.73052	3.81722	4.51005		Fn positive HNSCC vs. Fn negative CRC	0.4134	-0.2005 to 1.027	No	ns	0.4483					10.4393	10.5097	12.0866	12.1924		Fn positive HNSCC vs. Fn negative CRC	-3.419	-4.001 to -2.837	Yes	****	<0.0001
	5.37683	7.00241	5.75119	4.17314		Fn negative HNSCC vs. Fn positive CRC	0.4632	-0.2267 to 1.153	No	ns	0.4535					9.25094	9.09387	11.776	14.1708		Fn negative HNSCC vs. Fn positive CRC	-3.765	-4.419 to -3.111	Yes	****	<0.0001
	3.19744	4.56602	6.27567	4.77272		Fn negative HNSCC vs. Fn negative CRC	0.7157	-0.02694 to 1.458	No	ns	0.0658					9.85965	7.21398	10.054	12.3824		Fn negative HNSCC vs. Fn negative CRC	-3.729	-4.433 to -3.025	Yes	****	<0.0001
	3.85932	5.32164	5.71623	4.91476		Fn positive CRC vs. Fn negative CRC	0.2525	-0.3835 to 0.8885	No	ns	>0.9999					6.97376	7.31546	12.4695	11.5925		Fn positive CRC vs. Fn negative CRC	0.03598	-0.5670 to 0.6390	No	ns	>0.9999
	3.90983	4.99537	3.87084	4.63016												6.45508	9.55526	11.9977	11.6786
	4.02168	6.99966	3.97842	3.60871												9.95492	9.25439	11.0507	11.6981
	4.72793	6.29103	7.24571	6.63868												8.30926	8.23908	11.9649	12.025
	4.07489	6.45297	6.62294	1.78875												5.12803	7.77456	11.7213	13.0192
	2.75615	4.83164	5.79035	4.9786												3.33821	5.79265	14.5353	12.0213
	3.63529	6.39884	7.0641	5.18869												10.4174	6.5286	12.3905	11.0066
	3.41082	6.16978	2.84928	2.74182												5.60759	7.43805	12.3417	11.7633
	5.30058	4.90775	4.36189	5.53067												9.76357	10.3047	12.2913	12.3349
	5.6131	3.87695	5.01124	3.41824												9.31824	11.2911	12.8265	12.5961
	5.36644	5.78905	4.75953	6.08683												4.64219	8.46345	13.0476	10.6132
	4.73828	2.70166	5.94	2.71808												11.7915	7.65607	12.3859	11.7023
	3.19936	3.40117	4.24719	2.82269												10.4463	11.5383	11.6133	10.6265
	3.84209	6.96463	4.23328	2.5986												6.94749	10.0691	10.6508	10.9244
	4.1809	5.02014	4.50857	2.97526												8.79967	7.55536	11.704	12.56
	6.09538	3.56533	4.07192	3.72583												9.87709	9.731	12.6038	12.4298
	5.10893	2.41857	4.16145	7.19876												7.79662	8.59766	11.2881	9.31074
	5.51602	4.52967	5.15006	4.96306												5.8163	10.3264	13.7086	12.2242
	4.93673	5.39631	5.78551	4.20204												9.98094	7.63197	12.3	12.416
	5.09978	1.70775	5.29251	5.27022												7.31514	5.25442	11.2598	11.3461
	5.29688	3.28151	6.86374	6.40835												6.57531	7.4055	10.4025	11.1016
	5.7361	4.52885	5.4921	6.44084												9.88279	8.19392	11.1413	13.0742
	4.9622	4.92193	6.96559	5.85847												7.07276	8.754	11.3978	12.112
	5.15461	5.50569	5.14327	4.85684												6.93608	5.57554	11.2649	12.6732
	6.18003	5.28983	5.0259	4.98128												7.17455	8.08305	11.5567	10.9821
	7.23642	3.80517	3.82431	5.8004												9.39108	8.13507	13.3299	11.9976
	6.5685	4.88093	5.99872	4.68396												7.93442	5.49355	9.31191	13.4833
	4.33421	5.77697	3.6777	5.45412												7.29327	7.38014	11.9737	12.6562
	3.6313	5.12501	4.82648	4.00222												10.3781	7.01851	10.3946	12.6793
	6.16502	6.7549	3.92849	3.37775												8.14138	8.94674	11.4756	12.3168
	6.19159	5.13934	2.70358	2.72111												9.69032	6.33022	12.1404	13.0897
	5.43322	6.83299	4.96047	2.4823												6.51362	9.64297	11.1068	12.3565
	3.48613	3.78584	4.4016	2.26664												8.33423	8.99224	8.53879	13.4895
	4.61069	2.84328	5.82578	4.62036												9.73491	7.26666	9.4442	10.325
	5.72198	4.44696	2.86772	2.59759												7.67783	6.31605	10.6653	12.1847
	3.41861	5.2763	1.73899	0.51005												9.92069	6.84641	12.3045	13.0344
	5.16119		4.12341	4.00234												8.89901		11.5635	10.9979
	3.63272		6.41672	0.49416												7.05162		8.98066	10.9143
	0		-0.32859	5.45513												7.08916		12.0482	11.4797
	5.46524		3.66629	3.02656												9.58067		11.8012	10.4647
	4.42655		3.59826	3.26309												8.00449		12.8344	12.3478
	6.10652		3.52414	4.28693												7.27958		12.7106	12.0496
	5.6045		5.18901	3.24082												9.28843		12.7179	11.9987
	4.61102		5.40113	6.18169												10.0964		11.7103	9.64501
	3.34106		6.48307	5.14954												9.91513		11.7198	11.95
	7.30632		4.6823	3.47262												7.78552		12.3024	12.8392
	6.15461		3.94589	6.9746												9.59476		10.898	9.18702
	2.87257		4.64994	2.19846												7.89124		11.5228	10.3597
	4.74941		4.82486	3.32947												8.41198		11.8094	11.9835
	4.49774		4.14397	3.7496												10.6397		12.2733	11.6968
	7.29886		4.87775													9.1336		12.2328
	6.25076		6.39618													10.7578		11.8338
	5.78432		4.44272													10.4868		11.2773
	5.62707		5.30618													8.6902		11.0566
	3.29271		3.95811													7.76299		11.6784
	1.85567		4.87134													9.47116		12.4191
	6.22781		-0.32859													9.37924		12.946
	6.47848		1.9373													7.81112		12.722
	3.81557		2.49168													7.03669		13.0958
	5.78597		3.44395													6.6945		10.8614
	3.16311		4.20042													9.52567		11.5964
	4.77797		2.44359													6.79708		14.1867
	3.39761		3.96807													6.68069		11.8889
	3.456		4.905													7.39029		14.2284
	5.9474		5.79185													8.08165		11.0089
	7.06442		2.10759													6.56127		10.1488
	6.21717		6.39356													9.4491		12.0835
	3.21059		3.24835													8.02005		10.9621
	3.59996		2.16144													8.33632		11.3177
	4.70934		-0.32859													7.83749		12.6324
	5.05351		2.00958													5.33375		11.7106
	5.28499		5.32735													8.58059		12.6394
	5.29571		4.43565													9.71866		12.3664
	6.43331		5.25878													5.93134		10.4742
	4.18393		5.21937													10.6898		13.0861
	6.04281		5.17582													6.27035		11.925
	1.94632		2.99201													9.6512		12.7625
	3.00761		4.06778													9.58169		11.2513
	5.04652															7.52644
	2.83163															7.16764
	2.56333															9.16947
	3.8355															10.2861
	3.16514															8.5242
	4.66731															8.22264
	3.60385															6.47128
	6.82258															10.8928
	3.99326															9.75995
	3.9355															8.59968
	5.67577															8.52205
	4.09356															7.42362
	5.36864															6.81331
	5.85966															10.6397
	2.84284															6.10182
	3.39558															9.72666
	3.79644															7.15138
	0.630033															11.3429
