# Supplementary material for: RadD from Fusobacterium nucleatum engages NKp46 to promote antitumor cytotoxicity
Source: eLife. 2026 May 1;14:RP108439. doi: 10.7554/eLife.108439 (PMC13134850; doi:10.7554/eLife.108439)
Supplement: Figure 1—source data 1. [file elife-108439-fig1-data1.xlsx]

## Sheet: Sheet1
Figure 1A HNSCC survival									Figure 1B CRC survival								Figure 1D NKp46 mRNA expression row data
	Years	NKp46 + Fn +	NKp46 + Fn -						Years	NKp46 + Fn +	NKp46 + Fn -							Fn positive HNSCC	Fn negative HNSCC	Fn positive CRC	Fn negative CRC
	0.175341	1							0	1								6.09626	5.01467	3.91805	3.07871
	0.208217	1							0	0								4.6975	4.3731	3.74072	2.57354
	0.334243	0							0	0								4.51254	4.18954	3.58157	2.55353
	0.394516	1							0.079451	1								4.43164	4.14813	3.113	2.4274
	0.506844	1							0.082191	0								3.96574	4.0706	2.92779	2.28266
	0.693143	1							0.084931	0								3.92233	3.48171	2.76332	2.27673
	0.701362	1		Comparison of Survival Curves					0.084931	0			Comparison of Survival Curves					3.91144	3.40479	2.72896	2.21555		Bonferroni's multiple comparisons test	Mean Diff.	95.00% CI of diff.	Significant?	Summary	Adjusted P Value
	0.756156	1							0.167121	0								3.89061	3.36032	2.58217	2.12496		Fn positive HNSCC vs. Fn negative HNSCC	-0.6697	-1.228 to -0.1114	Yes	**	0.0096
	0.852045	0		Log-rank (Mantel-Cox) test					0.334243	1			Log-rank (Mantel-Cox) test					3.80007	3.2709	2.57124	2.02673		Fn positive HNSCC vs. Fn positive CRC	0.9501	0.4924 to 1.408	Yes	****	<0.0001
	0.879442	0		Chi square	9.091				0.498625	0			Chi square	1.31				3.66852	3.2523	2.03416	2.01112		Fn positive HNSCC vs. Fn negative CRC	1.038	0.5261 to 1.550	Yes	****	<0.0001
	0.895881	1		df	1				0.501364	0			df	1				3.59781	3.24917	2.02698	1.52822		Fn negative HNSCC vs. Fn positive CRC	1.62	1.045 to 2.195	Yes	****	<0.0001
	0.945195	0		P value	0.0026				0.668486	0			P value	0.2525				3.47581	3.19552	1.8431	1.44148		Fn negative HNSCC vs. Fn negative CRC	1.708	1.088 to 2.327	Yes	****	<0.0001
	0.961633	1		P value summary	**				0.698622	0			P value summary	ns				3.43308	3.13291	1.79893	1.29891		Fn positive CRC vs. Fn negative CRC	0.08786	-0.4425 to 0.6182	No	ns	>0.9999
	0.978071	1		Are the survival curves sig different?	Yes				0.838347	1			Are the survival curves sig different?	No				2.95682	3.01142	1.73053	1.23163
	0.986291	1							0.999989	0								2.93369	2.86126	1.64648	1.08828
	1.00273	1							1.08492	0								2.84254	2.79751	1.63919	1.07339
	1.04108	1							1.08492	0								2.83766	2.71563	1.55813	1.04747
	1.07396	0							1.12875	0								2.77123	2.66273	1.52426	0.893286
	1.1041	1							1.16163	1								2.75333	2.57102	1.50077	0.841834
	1.11232	1							1.16163	0								2.73885	2.33931	1.45401	0.644796
	1.11506	0							1.34519	0								2.69882	2.29968	1.34823	0.535781
	1.19451	1							1.35341	1								2.66716	2.26165	1.29983	0.534759
	1.2493	1							1.35889	1								2.59939	2.23432	1.24568	0.527971
	1.26574	1							1.36985	0								2.52286	2.13986	1.23163	0.51005
	1.34519	0							1.38081	1								2.49511	1.84844	1.16999	0.49599
	1.35067	1							1.41916	0								2.45004	1.84479	1.16055	0.495183
	1.42464	0							1.58628	1								2.43917	1.80838	1.10075	0.478817
	1.45204	1							1.58628	0								2.38802	1.75365	1.06787	0.418516
	1.50135	1							1.61094	0								2.2646	1.75022	1.05792	0.41846
	1.53149	0							1.63834	0								2.21711	1.70217	1.0246	0.371923
	1.56985	0							1.66847	0								2.20094	1.70208	1.02112	0.315366
	1.58081	1							1.67669	0								2.20082	1.62035	0.971957	0
	1.58902	1							2.02738	1								2.1927	1.58246	0.957084	0
	1.70409	0							2.07669	1								2.18571	1.57478	0.935849	0
	1.70683	0							2.08491	0								2.12872	1.54888	0.850837	0
	1.75615	0							2.16984	0								2.12476	1.50197	0.819197	0
	1.76436	0							2.41641	0								2.08127	1.45665	0.793743	0
	1.79176	1							2.45477	0								1.94103	1.19396	0.668738	0
	1.89861	0							2.49586	0								1.8986	1.04509	0.621432	0
	1.92053	0							2.53696	0								1.76825	0.963622	0.484808	-0.432019
	1.97806	0							2.60819	0								1.57202	0.949647	0.38432	-0.432019
	1.98628	0							2.72874	0								1.54384	0.82546	0.377347	-0.432019
	2.1808	0							2.74791	0								1.54023	0.520649	0.33807	-0.432019
	2.20819	1							2.75339	0								1.53814	0.344488	0.337451	-0.432019
	2.50134	0							2.91504	0								1.49784	0	0	-0.432019
	2.55614	0							2.91778	0								1.45418	0	0	-0.432019
	2.73148	0							2.92599	0								1.37885	0	0	-0.432019
	2.82189	0							2.99997	1								1.37245		0	-0.432019
	2.98627	1							3.0438	0								1.36132		0	-0.432019
	3.10408	1							3.0849	0								1.29825		0	-0.432019
	3.2301	0							3.0849	0								1.28966		0	-0.432019
	3.29311	1							3.08764	0								1.28794		0	-0.432019
	3.41092	0							3.08764	0								1.25411		-0.432019	-0.432019
	3.58626	0							3.0986	0								1.24556		-0.432019	-0.432019
	3.86023	0							3.52325	0								1.24544		-0.432019	-0.432019
	3.91229	0							3.5753	1								1.24123		-0.432019	-0.432019
	4.01639	0							3.64654	0								1.23909		-0.432019	-0.432019
	4.03283	0							3.9205	0								1.22293		-0.432019	-0.432019
	4.04927	0							4.50132	0								1.17447		-0.432019	-0.432019
	4.16708	0							5.15337	1								1.17428		-0.432019	-0.432019
	4.33968	0							5.33145	0								1.09869		-0.432019	-0.432019
	4.54789	0							0		0							1.05818		-0.432019
	4.55611	0							0		0							1.04558		-0.432019
	4.57803	1							0		0							1.02623		-0.432019
	4.63009	0							0		0							1.02148		-0.432019
	4.71502	0							0.082191		0							1.01421		-0.432019
	4.75885	0							0.084931		0							0.828632		-0.432019
	4.78899	1							0.084931		0							0.824401		-0.432019
	4.82734	1							0.084931		0							0.801986		-0.432019
	4.87118	0							0.084931		0							0.78073		-0.432019
	5.04104	0							0.471228		1							0.773996		-0.432019
	5.46569	0							0.701362		1							0.742006		-0.432019
	5.48487	1							0.906839		1							0.734482		-0.432019
	5.80816	1							1.063		0							0.666211		-0.432019
	5.87117	0							1.43834		0							0.614757		-0.432019
	5.93418	1							1.45478		0							0.587941		-0.432019
	5.9424	0							1.51505		0							0.562572		-0.432019
	6.13418	0							1.66573		0							0.520649		-0.432019
	7.0191	0							1.71779		0							0.51248		-0.432019
	7.44375	1							1.75067		0							0.494364		-0.432019
	7.47115	0							1.83286		0							0.447844		-0.432019
	7.50951	1							1.86299		1							0.444137		-0.432019
	7.62731	0							1.99998		0							0.4246		-0.432019
	9.26291	0							2.08491		0							0.421156		-0.432019
	10	0							2.25203		0							0.402067		-0.432019
	10	0							2.4986		0							0.348006		-0.432019
	10	0							2.58353		0							0.307429		-0.432019
	0.038356		1						2.66846		0							0		-0.432019
	0.293147		1						2.74244		0							0		-0.432019
	0.399996		0						2.74518		0							0
	0.597254		1						2.77805		0							0
	0.641089		0						2.83559		0							0
	0.750677		1						2.83559		0							0
	0.761635		0						2.88764		0							0
	0.799991		1						2.91778		0							0
	0.799991		0						3.17257		1							0
	0.953414		1						3.33147		0							0
	0.964373		1						3.41366		0							0
	0.99177		0						3.4164		0							0
	1.08218		1						3.56434		0							0
	1.08766		1						3.58626		0							0
	1.1041		1						3.64654		1							0
	1.31231		1						4.0027		0							0
	1.43012		1						4.68762		1							0
	1.49587		1						4.8657		0							0
	1.53423		1						5.84651		1							0
	1.55615		0						8.89579		0							0
	1.70409		0
	1.82464		1
	1.99176		1
	2.09039		1
	2.14518		0
	2.18902		0
	2.2986		1
	2.33696		1
	2.36162		1
	2.57805		1
	2.6849		1
	2.73422		1
	2.87668		0
	2.96161		1
	3.15613		0
	3.24106		0
	3.53147		1
	3.81914		1
	4.34516		0
	4.74515		1
	4.86844		0
	5.1972		0
	5.70679		1
	8.82456		0
