# Supplementary material for: RadD from Fusobacterium nucleatum engages NKp46 to promote antitumor cytotoxicity
Source: eLife. 2026 May 1;14:RP108439. doi: 10.7554/eLife.108439 (PMC13134850; doi:10.7554/eLife.108439)
Supplement: Figure 3—source data 1. [file elife-108439-fig3-data1.xlsx]

## Sheet: Sheet1
Figure 3-source data 1
ATCC 10953																			Tukey's multiple comparisons test	Mean Diff.	95.00% CI of diff.	Significant?	Summary	Adjusted P Value
			FN10953 WT						FN10953FAD-I						FN10953RadD				Ccm-1
	Ccm-1	0.800204	1.12476	1.05601	0.353894		7.3903	15.6402	6.04951	9.18821	1.51791		1.11099	1.27273	1.17866	1.02326	0.521815		FN10953 WT vs. FN10953FAD-I	-7.124	-16.16 to 1.916	No	ns	0.0906
	NKp46	8.70149	11.3714	9.57535			251.748	269.407	340.825	251.372	293.076		1.50277	1.4458	1.48586	1.19947			FN10953 WT vs. FN10953RadD	-0.1878	-0.7633 to 0.3877	No	ns	0.4589
	Ncr-1	11.3577	27.1402	11.8603			180.046	226.784	160.594	275.921	329.435		1.42064	1.61422	1.51157	0.986231			FN10953FAD-I vs. FN10953RadD	6.936	-0.9016 to 14.77	No	ns	0.0722
																			NKp46
																			FN10953 WT vs. FN10953FAD-I	-271.4	-416.7 to -126.1	Yes	*	0.0149
																			FN10953 WT vs. FN10953RadD	8.474	4.042 to 12.91	Yes	*	0.0142
																			FN10953FAD-I vs. FN10953RadD	279.9	195.5 to 364.3	Yes	**	0.0017
																			Ncr-1
																			FN10953 WT vs. FN10953FAD-I	-217.8	-404.1 to -31.44	Yes	*	0.0371
																			FN10953 WT vs. FN10953RadD	15.4	-12.86 to 43.67	No	ns	0.1505
																			FN10953FAD-I vs. FN10953RadD	233.2	117.2 to 349.2	Yes	**	0.0072
ATCC 23726
		FN23726 WT					FN23726 FAD-I					FN23726 RadD							Tukey's multiple comparisons test	Mean Diff.	95.00% CI of diff.	Significant?	Summary
	Ccm-1		0.639351	0.744849	0.619863			1.62039	1.05144	0.855072			1.18777	1.0812	0.955072
	NKp46		19.3025	12.3724	9.85227			119.393	64.4556	56.8824			1.26346	1.2015	1.11884				CCM1
	Ncr-1		12.9299	17.6182	10.0218			125.454	69.1096	88.2685			1.04076	1.05639	1.00435				FN23726 WT vs. FN23726 FAD-I	-0.5076	-31.75 to 30.74	No	ns
																			FN23726 WT vs. FN23726 RadD	-0.4067	-31.65 to 30.84	No	ns
																			FN23726 FAD-I vs. FN23726 RadD	0.101	-31.14 to 31.35	No	ns
																			NKp46
																			FN23726 WT vs. FN23726 FAD-I	-66.4	-97.65 to -35.16	Yes	***
																			FN23726 WT vs. FN23726 RadD	12.65	-18.60 to 43.89	No	ns
																			FN23726 FAD-I vs. FN23726 RadD	79.05	47.80 to 110.3	Yes	****
																			NCR1
																			FN23726 WT vs. FN23726 FAD-I	-80.75	-112.0 to -49.51	Yes	****
																			FN23726 WT vs. FN23726 RadD	12.49	-18.76 to 43.73	No	ns
																			FN23726 FAD-I vs. FN23726 RadD	93.24	62.00 to 124.5	Yes	****
