# Supplementary material for: RadD from Fusobacterium nucleatum engages NKp46 to promote antitumor cytotoxicity
Source: eLife. 2026 May 1;14:RP108439. doi: 10.7554/eLife.108439 (PMC13134850; doi:10.7554/eLife.108439)
Supplement: Figure 4—figure supplement 2—source data 1. [file elife-108439-fig4-figsupp2-data1.xlsx]

## Sheet: Sheet1
Figure 4A-figure1 supplement 2-source data
MFI of ATCC 10953 ∆FadI															MFI of ATCC 23726 ∆FadI
		Ccm-1 Ig				NKp46 Ig				Ncr-1 Ig							Ccm-1 Ig				NKp46 Ig				Ncr-1 Ig
	Control	5mM	10mM		Control	5mM	10mM		Control	5mM	10mM					Control	5mM	10mM		Control	5mM	10mM		Control	5mM	10mM
	514.1	370.6	453.8		24851.9	5305.2	1777.4		31427	10273.5	5206.8					98.25	140.2	151.2		12725	6524.8	3495.3		9192.8	5363.3	4011.1
	558.25	308.3	437.6		24582.2	5932.6	1802.35		31737	10053.1	4975					118.7	162.9	298.1		12842.4	6172.95	3309.9		9175.35	5211.1	3727.85
	695.15	259	379.2		26434.8	5933.3	2071.3		36125.3	9083.8	4527.95					141.6	215.15	309		10969	6057.3	3000.65		10659.4	5459.1	3854.1
	688.75	650.35	301.4		25233.1	5742.3	1738.1		30491	10648.5	6497.35					158.6	243.6	273.7		11649.1	5971.7	2678		8390.55	5625.7	4016
		Tukey's multiple comparisons test	Mean Diff.	95.00% CI of diff.	Significant?	Summary	Adjusted P Value									Tukey's multiple comparisons test	Mean Diff.	95.00% CI of diff.	Significant?	Summary	Adjusted P Value
	Ccm-1 Ig	Control vs. 5mM	217	-2066 to 2500	No	ns	>0.9999								Ccm-1 Ig	Control vs. 5mM	-61.18	-1168 to 1045	No	ns	>0.9999
		Control vs. 10mM	221.1	-2061 to 2504	No	ns	>0.9999									Control vs. 10mM	-128.7	-1235 to 977.8	No	ns	>0.9999
		5mM vs. 10mM	-1450	-3733 to 832.3	No	ns	0.4705									5mM vs. 10mM	-67.54	-1174 to 1039	No	ns	>0.9999
	NKp46 Ig	Control vs. 5mM	-9401	-11683 to -7118	Yes	****	<0.0001								NKp46 Ig	Control vs. 5mM	5865	4758 to 6971	Yes	****	<0.0001
		Control vs. 10mM	-4688	-6970 to -2405	Yes	****	<0.0001									Control vs. 10mM	8925	7819 to 10032	Yes	****	<0.0001
		5mM vs. 10mM	3881	1599 to 6164	Yes	***	0.0001									5mM vs. 10mM	3061	1954 to 4167	Yes	****	<0.0001
		Control vs. 5mM	22430	20148 to 24713	Yes	****	<0.0001									Control vs. 5mM	3940	2833 to 5046	Yes	****	<0.0001
	Ncr-1 Ig	Control vs. 10mM	27143	24861 to 29426	Yes	****	<0.0001								Ncr-1 Ig	Control vs. 10mM	5452	4346 to 6559	Yes	****	<0.0001
		5mM vs. 10mM	4713	2430 to 6995	Yes	****	<0.0001									5mM vs. 10mM	1513	406.1 to 2619	Yes	**	0.0025
