# Supplementary material for: RadD from Fusobacterium nucleatum engages NKp46 to promote antitumor cytotoxicity
Source: eLife. 2026 May 1;14:RP108439. doi: 10.7554/eLife.108439 (PMC13134850; doi:10.7554/eLife.108439)
Supplement: Figure 4—source data 1. — The source data also include raw MFI values for the quantification shown in Figure 4C. [file elife-108439-fig4-data1.xlsx]

## Sheet: Sheet1
Figure 4A-source data 1
MFI of fusion proteins binding to ATCC 10953
		Ccm-1 Ig				NKp46 Ig				Ncr-1 Ig
	0mM	5mM	10mM		0mM	5mM	10mM		0mM	5mM	10mM
	9092.8	16344.3	20449.3		290116	102147	24690.1		144581	97436.9	56188.6
	4951.6	14428.3	19906.3		279211	85341.2	29603.3		155700	105546	64389.2
	5221.05	14197.3	45499.7		224368	87726.1	26802		136678	99146.5	59395.4
		Tukey's multiple comparisons test	Mean Diff.	95.00% CI of diff.	Significant?	Summary	Adjusted P Value
	Ccm-1 Ig	0mM vs. 5mM	-8568	-47628 to 30491	No	ns	0.9965
		0mM vs. 10mM	-22197	-61256 to 16863	No	ns	0.5671
		5mM vs. 10mM	-12042	-51101 to 27018	No	ns	0.9701
	NKp46 Ig	0mM vs. 5mM	-85316	-124376 to -46257	Yes	****	<0.0001
		10mM vs. 5mM	-63120	-102179 to -24060	Yes	***	0.0006
		0mM vs. 10mM	-94288	-133347 to -55229	Yes	****	<0.0001
	Ncr-1 Ig	0mM vs. 5mM	44943	5884 to 84003	Yes	*	0.0174
		5mM vs. 10mM	40719	1659 to 79778	Yes	*	0.0373
		0mM vs. 10mM	204574	165514 to 243633	Yes	****	<0.0001
Figure 4C-source data 1
MFI of NKp46-Ig Binding ± Anti-NKp46
Blocking Antibody
	secondary antibody	NKp46-Ig	NKp46-Ig+ antiPVR	NKp46-Ig+ antiNKp46 02	NKp46-Ig+antiNKp46 9E2	NKp46-Ig+antiNKp46 461-G1
	193.7	4881.15	4375.45	3726.1	4344.3	4032.9
	197.2	4643.7	4278.4	3685.25	4303.85	4248.1
	197.8	3769.4	3625.4	2480.45	3874.6	3751
	201	4106.4	4033.8	2940.7	4441.4	4075.45
	265.75	4084	4027.65	2124.55	4036.6	4327.7
	256.5	4138.7	4198.6	2395.9	4234.7	3940.1
	258	4128.1	4313.9	2747.9	4014.65	3627
	256.8	4280.4	4242.35	2889.1	3753	3625.1
	Tukey's multiple comparisons test	Mean Diff.	95.00% CI of diff.	Significant?	Summary	Adjusted P Value
	Secondary vs. NKp46-Ig	-4026	-4517 to -3535	Yes	****	<0.0001
	Secondary vs. anti-PVR	-3909	-4399 to -3418	Yes	****	<0.0001
	Secondary vs. anti-NKp46-02	-2645	-3136 to -2155	Yes	****	<0.0001
	Secondary vs. anti-NKp46-9E2	-3897	-4388 to -3406	Yes	****	<0.0001
	Secondary vs. anti-NKp46-461-G1	-3725	-4216 to -3234	Yes	****	<0.0001
	NKp46-Ig vs. anti-PVR	117	-373.8 to 607.9	No	ns	0.9795
	NKp46-Ig vs. anti-NKp46-02	1380	889.4 to 1871	Yes	****	<0.0001
	NKp46-Ig vs. anti-NKp46-9E2	128.6	-362.3 to 619.5	No	ns	0.9691
	NKp46-Ig vs. anti-NKp46-461-G1	300.6	-190.3 to 791.4	No	ns	0.4596
	anti-PVR vs. anti-NKp46-02	1263	772.3 to 1754	Yes	****	<0.0001
	anti-PVR vs. anti-NKp46-9E2	11.56	-479.3 to 502.4	No	ns	>0.9999
	anti-PVR vs. anti-NKp46-461-G1	183.5	-307.4 to 674.4	No	ns	0.872
	anti-NKp46-02 vs. anti-NKp46-9E2	-1252	-1743 to -760.8	Yes	****	<0.0001
	anti-NKp46-02 vs. anti-NKp46-461-G1	-1080	-1571 to -588.8	Yes	****	<0.0001
	anti-NKp46-9E2 vs. anti-NKp46-461-G1	172	-318.9 to 662.8	No	ns	0.8995
