# Supplementary material for: RadD from Fusobacterium nucleatum engages NKp46 to promote antitumor cytotoxicity
Source: eLife. 2026 May 1;14:RP108439. doi: 10.7554/eLife.108439 (PMC13134850; doi:10.7554/eLife.108439)
Supplement: Figure 5—source data 1. — The source data also include tumor weight measurements from C57BL/6 mice and NCR1-KO mice corresponding to Figure 5E and F. [file elife-108439-fig5-data1.xlsx]

## Sheet: Sheet1
Figure 5-source data
Figure 5B-source data
		T47D cells
			NK+Cells	NK+Cells+FN10953	NK+Cells+FN10953+02 Ab	NK+Cells+FN10953ΔRadD	NK+Cells+FN10953ΔRadD+ 02 Ab
			1	1.20584	1.09878	1.08186	1.01509			Tukey's multiple comparisons test	Mean Diff.	95.00% CI of diff.	Significant?	Summary	Adjusted P Value
			1	1.2278	1.14672	1.14602	1.02244			NK+Cells vs. NK+Cells+FN10953	-0.2677	-0.3713 to -0.1641	Yes	****	<0.0001
			1	1.28138	1.1433	1.11198	0.994948			NK+Cells vs. NK+Cells+FN10953+02 Ab	-0.06239	-0.1660 to 0.04124	No	ns	0.4
			1	1.34583	0.995149	1.10614	0.949425			NK+Cells vs. NK+Cells+FN10953ΔRadD	-0.09532	-0.1989 to 0.008304	No	ns	0.0808
			1	1.27775	0.927973	1.0306	0.998473			NK+Cells vs. NK+Cells+FN10953ΔRadD+ 02 Ab	0.003924	-0.09970 to 0.1075	No	ns	>0.9999
										NK+Cells+FN10953 vs. NK+Cells+FN10953+02 Ab	0.2053	0.1017 to 0.3090	Yes	****	<0.0001
										NK+Cells+FN10953 vs. NK+Cells+FN10953ΔRadD	0.1724	0.06878 to 0.2760	Yes	***	0.0006
										NK+Cells+FN10953 vs. NK+Cells+FN10953ΔRadD+ 02 Ab	0.2716	0.1680 to 0.3753	Yes	****	<0.0001
										NK+Cells+FN10953+02 Ab vs. NK+Cells+FN10953ΔRadD	-0.03293	-0.1366 to 0.07069	No	ns	0.8733
										NK+Cells+FN10953+02 Ab vs. NK+Cells+FN10953ΔRadD+ 02 Ab	0.06631	-0.03731 to 0.1699	No	ns	0.3418
										NK+Cells+FN10953ΔRadD vs. NK+Cells+FN10953ΔRadD+ 02 Ab	0.09924	-0.004380 to 0.2029	No	ns	0.0646
Figure 5C-source data
		MCF7 cells
										Tukey's multiple comparisons test	Mean Diff.	95.00% CI of diff.	Significant?	Summary	Adjusted P Value
			NK+Cells	NK+Cells+FN10953	NK+Cells+FN10953+02 Ab	NK+Cells+FN10953ΔRadD	NK+Cells+FN10953ΔRadD+ 02 Ab			NK+Cells vs. NK+Cells+FN10953	-0.6298	-0.9035 to -0.3561	Yes	****	<0.0001
			1	1.60353	1.09627	0.988163	0.937418			NK+Cells vs. NK+Cells+FN10953+02 Ab	0.07055	-0.2032 to 0.3443	No	ns	0.936
			1	1.60065	0.927152	0.749267	1.09778			NK+Cells vs. NK+Cells+FN10953ΔRadD	-0.1385	-0.4123 to 0.1352	No	ns	0.5654
			1	1.65409	0.826355	1.10879	0.958434			NK+Cells vs. NK+Cells+FN10953ΔRadD+ 02 Ab	0.01492	-0.2588 to 0.2886	No	ns	0.9998
			1	1.67352	0.839415	1.48595	1.01766			NK+Cells+FN10953 vs. NK+Cells+FN10953+02 Ab	0.7003	0.4266 to 0.9741	Yes	****	<0.0001
			1	1.61712	0.958081	1.36054	0.914101			NK+Cells+FN10953 vs. NK+Cells+FN10953ΔRadD	0.4912	0.2175 to 0.7650	Yes	***	0.0003
										NK+Cells+FN10953 vs. NK+Cells+FN10953ΔRadD+ 02 Ab	0.6447	0.3710 to 0.9184	Yes	****	<0.0001
										NK+Cells+FN10953+02 Ab vs. NK+Cells+FN10953ΔRadD	-0.2091	-0.4828 to 0.06464	No	ns	0.1905
										NK+Cells+FN10953+02 Ab vs. NK+Cells+FN10953ΔRadD+ 02 Ab	-0.05562	-0.3294 to 0.2181	No	ns	0.9722
										NK+Cells+FN10953ΔRadD vs. NK+Cells+FN10953ΔRadD+ 02 Ab	0.1535	-0.1203 to 0.4272	No	ns	0.4689
Figure 5E-source data
			WT-AT3	WT AT3+ATCC 10953	WT AT3+ATCC 10953ΔRadD
			3211	2915	5097.7
			3104	4389	5358.9
			2279.4	1944	5280.1
			2471.8	1691.6	5120		Tukey's multiple comparisons test	Mean Diff.	95.00% CI of diff.	Significant?	Summary	Adjusted P Value
			1533.6	3980	3256		WT-AT3 vs. WT AT3+Fuso10953	-807.7	-1532 to -83.30	Yes	*	0.0259
			2103.2	2631	4395		WT-AT3 vs. WT AT3+Fuso10953ΔRadD	-2131	-2983 to -1280	Yes	****	<0.0001
			1887.3	3071	3174		WT AT3+Fuso10953 vs. WT AT3+Fuso10953ΔRadD	-1323	-2127 to -519.9	Yes	***	0.0007
			2749.1	2600	5032
			3008	2413	4336
			1507	1690.3	5188
			2885.1	4960
			2849.8	2614
			3105	3309
			2203	4178.1
				3780
				3544
				4280
				4483
				4234
Figure 5F-source data
			NCR1-KO AT3	NCR1-KO AT3+ATCC 10953	NCR1-KO AT3+ATCC10953ΔRadD
			2674	2985	3283.1
			3578	2006	4907.7
			4212	4215	3578
			1702.7	1122	3531		Tukey's multiple comparisons test	Mean Diff.	95.00% CI of diff.	Significant?	Summary	Adjusted P Value
			1107	3006	3683.6		NCR1-KO AT3 vs. NCR1-KO AT3+ATCC 10953	232.7	-787.9 to 1253	No	ns	0.8459
			4182	1037	3532		NCR1-KO AT3 vs. NCR1-KO AT3+ATCC10953ΔRadD	-18.92	-1024 to 986.6	No	ns	0.9989
			2888	2068	5242		NCR1-KO AT3+ATCC 10953 vs. NCR1-KO AT3+ATCC10953ΔRadD	-251.6	-1257 to 753.9	No	ns	0.8176
			3989	1148	4151
			3170	3288	3568
			3780	2835	1784
			3842	2147	2055
			1222	2902	1075
			4595	3046	3552
			2415	4843	1280
			4183	4902	2120
			1389	3656.3	2169
					2797
